# Supplementary material for: Improving the performance of a SnS2 cathode with interspace layer engineering using a Na+ insertion/extraction method for aqueous zinc ion batteries
Source: Royal Society of Chemistry journal article supplement (doi:10.1039/d3ta05251f), 2023-12-11
Supplement: d3ta05251f1.pdf [file d3ta05251f1.pdf]

## Supplementary Information

### Improving the Performance of SnS<sub>2</sub> Cathode with Interspace Layer Engineering Using Na<sup>+</sup> Insertion/Extraction Method for Aqueous Zinc Ion Batteries

Ali Molaei Aghdam <sup>\*a</sup>, Nima Mikaeili Chahartagh<sup>b</sup>, Ehsan Delfani<sup>b</sup>, Shahriar Namvar<sup>c</sup>, Mahshid  
Ershadi<sup>d</sup>, Farshad Boorboor Ajdari<sup>\*e,f</sup>

<sup>a</sup>*Department of Chemical Engineering, Auburn University, Auburn, AL 36849, USA*

<sup>b</sup>*Surface Reaction and Advanced Energy Materials Laboratory, Department of Chemical Engineering, Amirkabir  
University of Technology (Tehran Polytechnic), PO Box 15875-4413, Tehran, Iran*

<sup>c</sup>*Department of Chemistry, Amirkabir University of Technology (Tehran Polytechnic),  
PO Box 15875-4413, Tehran, Iran*

<sup>d</sup>*State Key Laboratory for Mechanical Behavior of Materials, Xi'an Jiaotong University, Xi'an, 710049 P.*

*R. China*

<sup>e</sup>*Department of Applied chemistry, Faculty of Chemistry, University of Kashan, Kashan, Iran*

E-mail: [azm0382@auburn.edu](mailto:azm0382@auburn.edu),

[farshad@xjtu.edu.cn](mailto:farshad@xjtu.edu.cn)

## Materials Characterizations

On an X-ray diffractometer (Bruker D2 Phaser), the sample crystal structures were examined using copper-K $\alpha$  radiation ( $\lambda = 1.54178 \text{ \AA}$ ) throughout a  $2\theta$  range of 5 to 80 degrees. SEM (Philips XL 30) and TEM (Philips EM208) were used to examine the microstructure and morphology of the samples. A spectrometer (BRUKER-ALPHA) gathered Fourier transform infrared (FTIR) spectra. XPS measurements (PHI 5500) were taken to analyze the surface elemental composition and the corresponding valance states. HRTEM was performed using a field emission electron microscope (JEM-3000F (JEOL)) operating at 300 kV. EDX elemental mapping and HAADF-STEM investigations were done on a JEOL JEM-ARM200CF at 200 kV. A probe aberration corrector was installed in a STEM.

## Electrochemical Measurements

The dispersion of PVDF (10 wt%) binder, super black carbon (20 wt%), and active materials (70 wt%) were performed in N-Methyl pyrrolidone. The resultant slurry was cast onto Carbon cloth to make the working electrode. The electrode was then sliced into circular slices (diameter = 11 mm) with an active mass loading of 1.75-2.1 mg cm<sup>-2</sup> followed by vacuum drying at 80 °C for 10 hours. Fiber glass separator, working electrode, ZnSO<sub>4</sub> (1M) aqueous electrolyte, and zinc anode manufactured CR2032 coin cells in ambient air. Between the zinc anode and SnS<sub>2</sub>, the separator was used to complete the AZIB. Charge-discharge cycle measurements were conducted using a Kimiastat battery test system within a voltage range from 0 to 2 V vs. Zn<sup>2+</sup>/Zn. CV and electrochemical impedance spectroscopy (EIS) tests were recorded by Autolab (PGSTAT 302 N).

## Materials Synthesis

**Synthesis of SnS<sub>2</sub>:** SnS<sub>2</sub> was first synthesized by a hydrothermal method with SnCl<sub>2</sub>· 2H<sub>2</sub>O and thiourea as the sources of tin and sulfur, respectively. In a typical synthetic process, 2 mmol SnCl<sub>2</sub>·2H<sub>2</sub>O, 0.8 mL of HCl (mass fraction of 36-38%), and 16 mmol thiourea were dissolved into 60 mL of deionized water under vigorous magnetic stirring for 60 min to form a homogeneous solution. The solution was transferred into a 100 mL Teflon-lined stainless-steel autoclave followed by hydrothermal treatment at 145 °C for 24 h. After the autoclave was cooled to room temperature naturally, the obtained primary product, i.e., SnS<sub>2</sub>, was centrifuged and washed several times by deionized water and absolute ethyl alcohol and finally dried at 60 °C for 12 h in the air environment.

**Synthesis of SnS<sub>2</sub>-HIL:** To increase the interspace layer of SnS<sub>2</sub>, we used sodium ion insertion/extraction method. The coin-type cell was assembled with a cathode, fiber glass as a separator, and zinc foil as an anode. For the sodium source, we used 1M sodium sulfate electrolyte. Insertion/ extraction Na ion was conducted under constant current protocol using are battery tester within a voltage range of 0–2 V vs. Zn/Zn<sup>2+</sup>.

**Zn-ions diffusion coefficient calculation based on the GITT measurement:**

The kinetics of Zn<sup>2+</sup> intercalation during the charge/discharge reaction of SnS<sub>2</sub>-HIL cathode material in depth was investigated using the galvanostatic intermittent titration technique (GITT).

The diffusion coefficient of Zn<sup>2+</sup> (D<sub>Zn</sub>) was calculated using the following equation:

$$D_{Zn} = \frac{4}{\pi\tau} \left( \frac{mV_m}{MA} \right)^2 \left( \frac{\Delta E_s}{\Delta E_\tau} \right)^2$$

Where  $\tau$ ,  $M$ ,  $m$ ,  $V_m$ ,  $A$  severally represented the relaxation time, the molar mass of active material, the mass of active material, the molar volume, and the contact area between electrode and electrolyte, while  $\Delta E_s$  and  $\Delta E\tau$  represented the values of pulse voltage change and voltage change of constant-current charge/discharge, respectively.

**Zn-ions concentration calculation:**

Firstly, the unit cell volume of SnS<sub>2</sub>-HIL was calculated by “ $a$  (3.826Å)  $\times$   $b$  (3.826Å)  $\times$   $c$  (3.826Å)  $\times$   $\sin 45^\circ = 39.601 \times 10^{-24} \text{ cm}^3$ ”, thereby 1 cm<sup>3</sup> contains  $1/39.601 \times 10^{-24} = 2.25 \times 10^{22}$  unit cells. Since each SnS<sub>2</sub>-HIL unit cell contains two molecules, and each molecule contains 0.9 Zn-ions, 1 cm<sup>3</sup> contains  $2.25 \times 10^{22}/6.02 \times 10^{23} \times 8 \times 0.9 = 5.15 \times 10^{-3}$  mol Zn-ions. Therefore, the Zn-ions concentration in the electrode is approximately  $5.15 \times 10^{-3} \text{ mol cm}^{-3}$ .

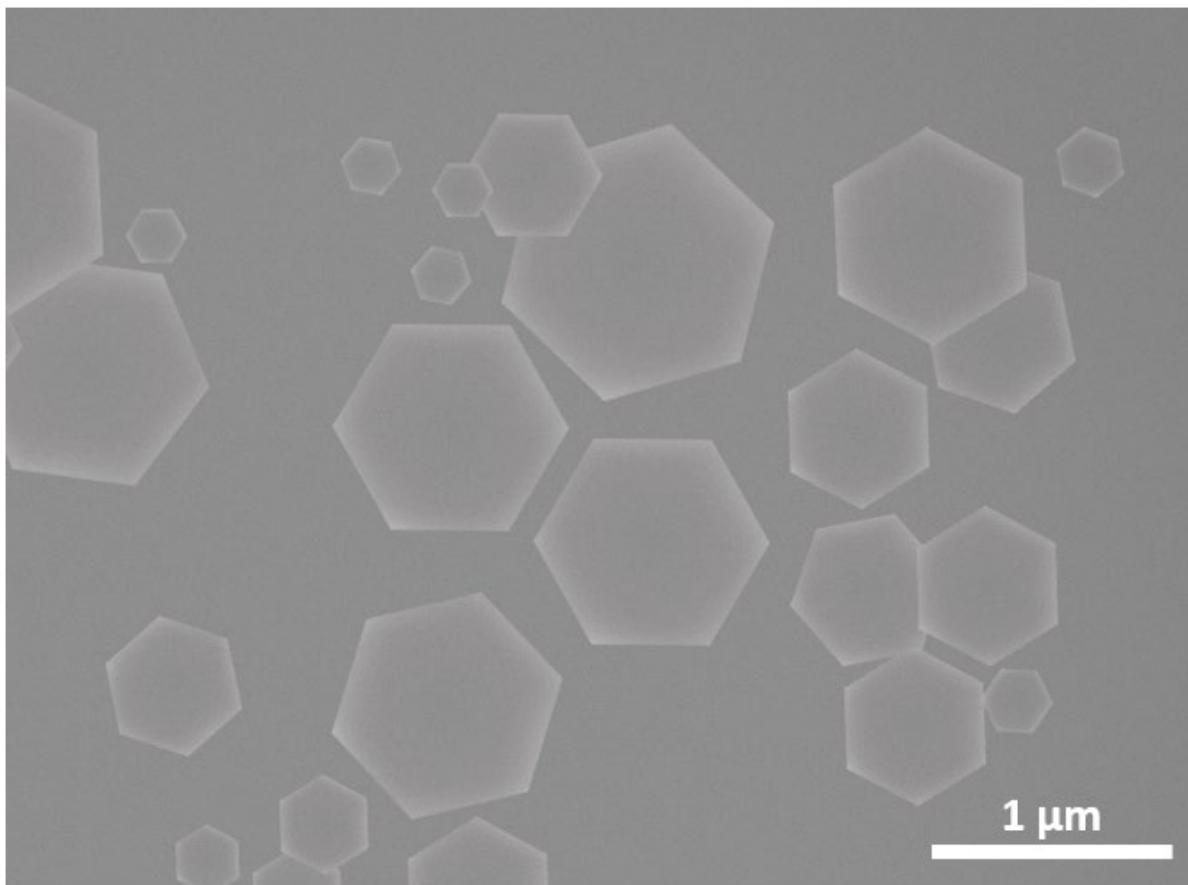

**Figure S1.** SEM image of SnS<sub>2</sub>

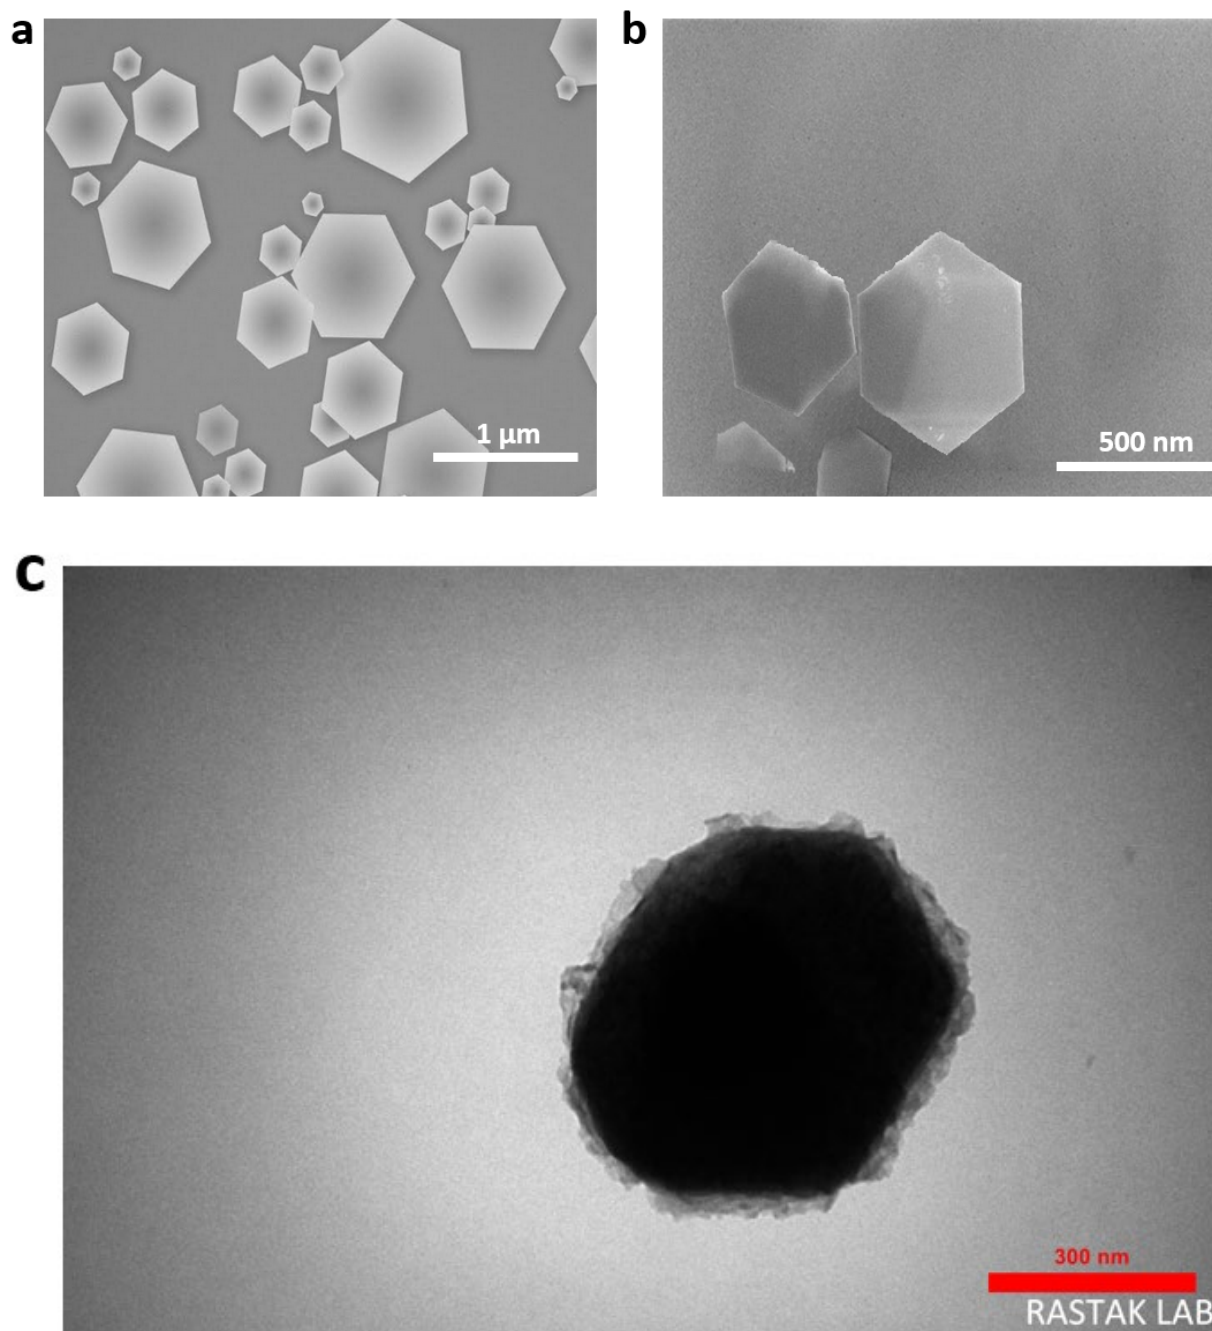

**Figure S2.** a,b) SEM image of SnS<sub>2</sub> after insertion/extraction Na<sup>+</sup>. c) TEM image of SnS<sub>2</sub> after insertion/extraction Na<sup>+</sup>.

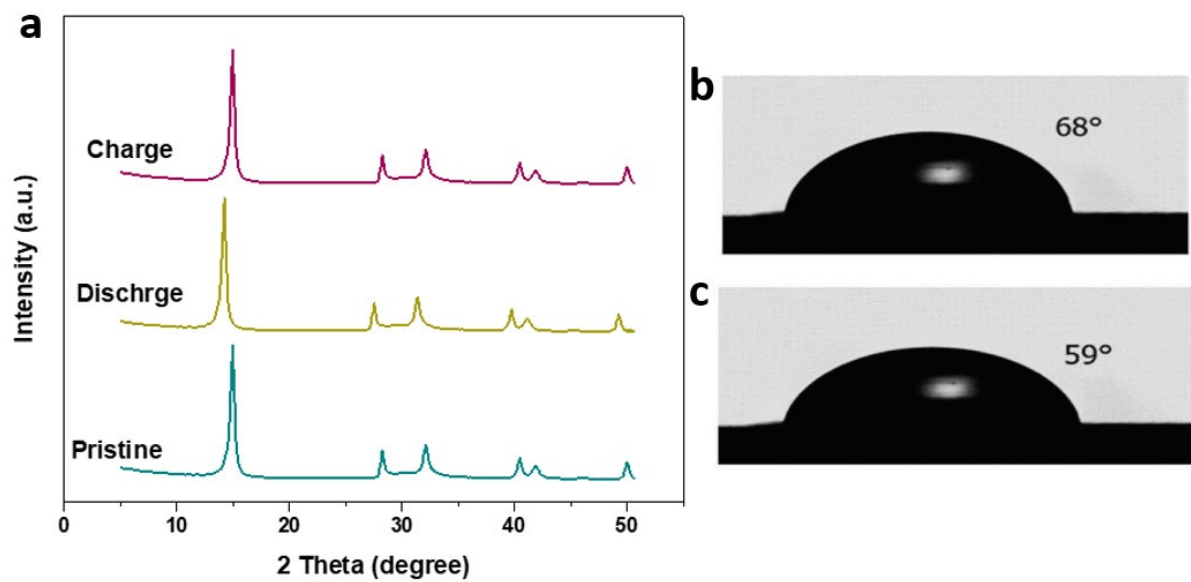

**Figure S3.** a) XRD for pristine SnS<sub>2</sub> and SnS<sub>2</sub> cathodes after insertion/extraction Na<sup>+</sup>. Water contact angles of b) pristine SnS<sub>2</sub> and c) after insertion/extraction Na<sup>+</sup>.

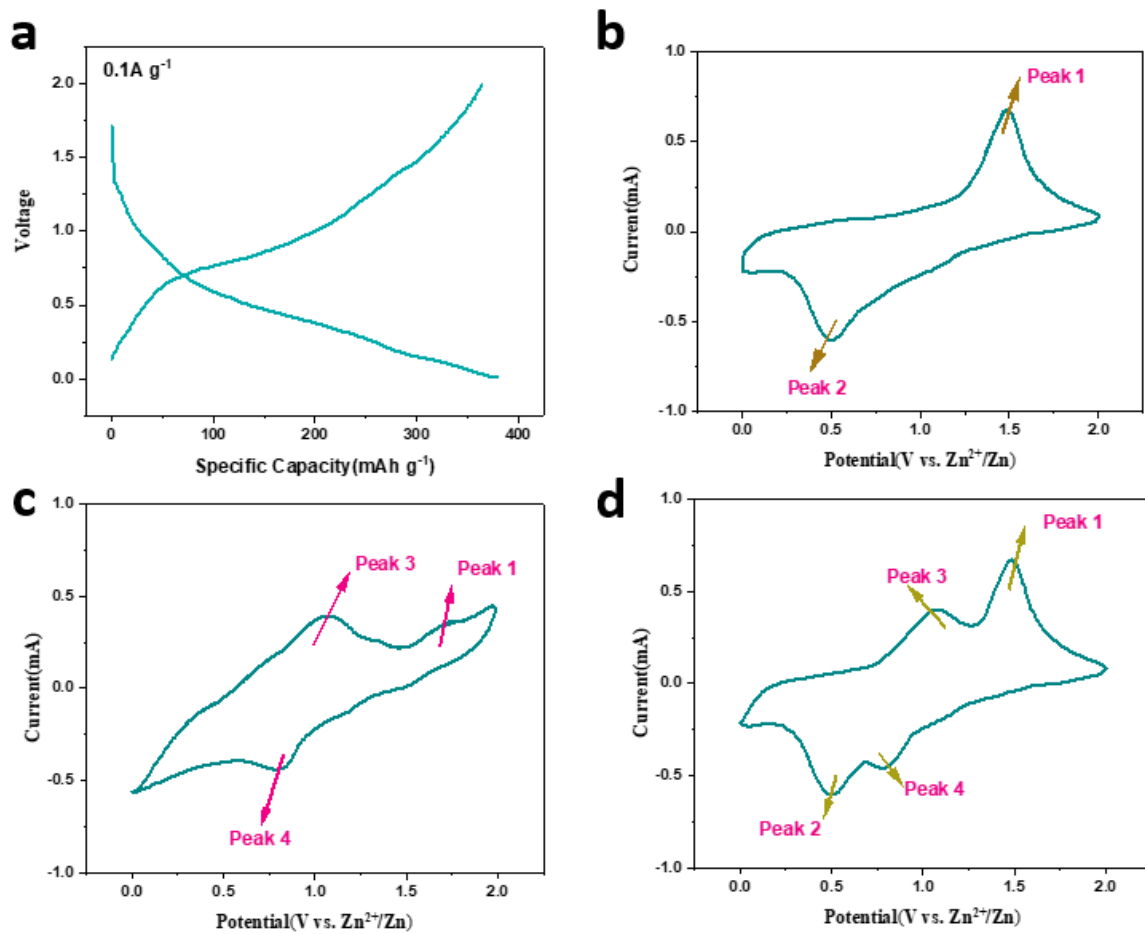

**Figure S4.** a) charge/discharge curves at 0.1 A g<sup>-1</sup> over the voltage range of 0-2 V of the SnS<sub>2</sub> cathode for Na<sup>+</sup> insertion/extraction in 1M Na<sub>2</sub>SO<sub>4</sub>. CV curves of SnS<sub>2</sub> cathodes at a scan rate of 0.3 mV s<sup>-1</sup> in b) 1M ZnSO<sub>4</sub>, c) 1M Na<sub>2</sub>SO<sub>4</sub>, and d) 1M Na<sub>2</sub>SO<sub>4</sub> + 1M ZnSO<sub>4</sub>



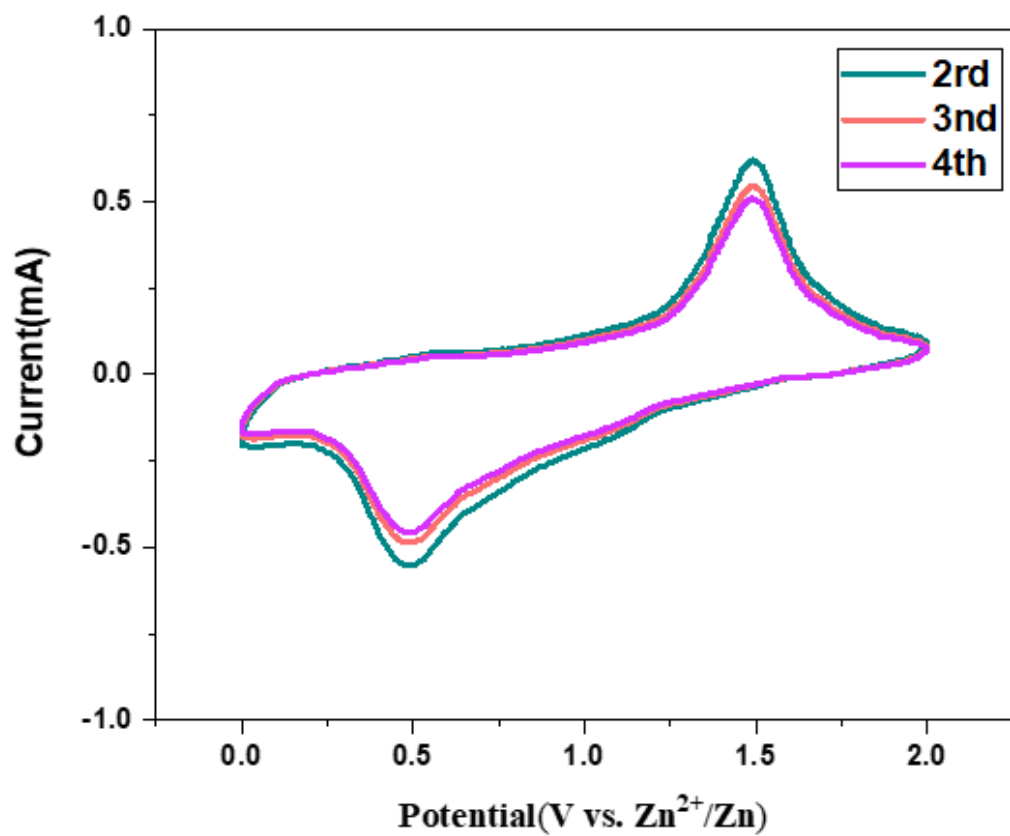

**Figure S5.** CV curves of SnS<sub>2</sub> cathodes at a scan rate of 0.3 mV s<sup>-1</sup>.

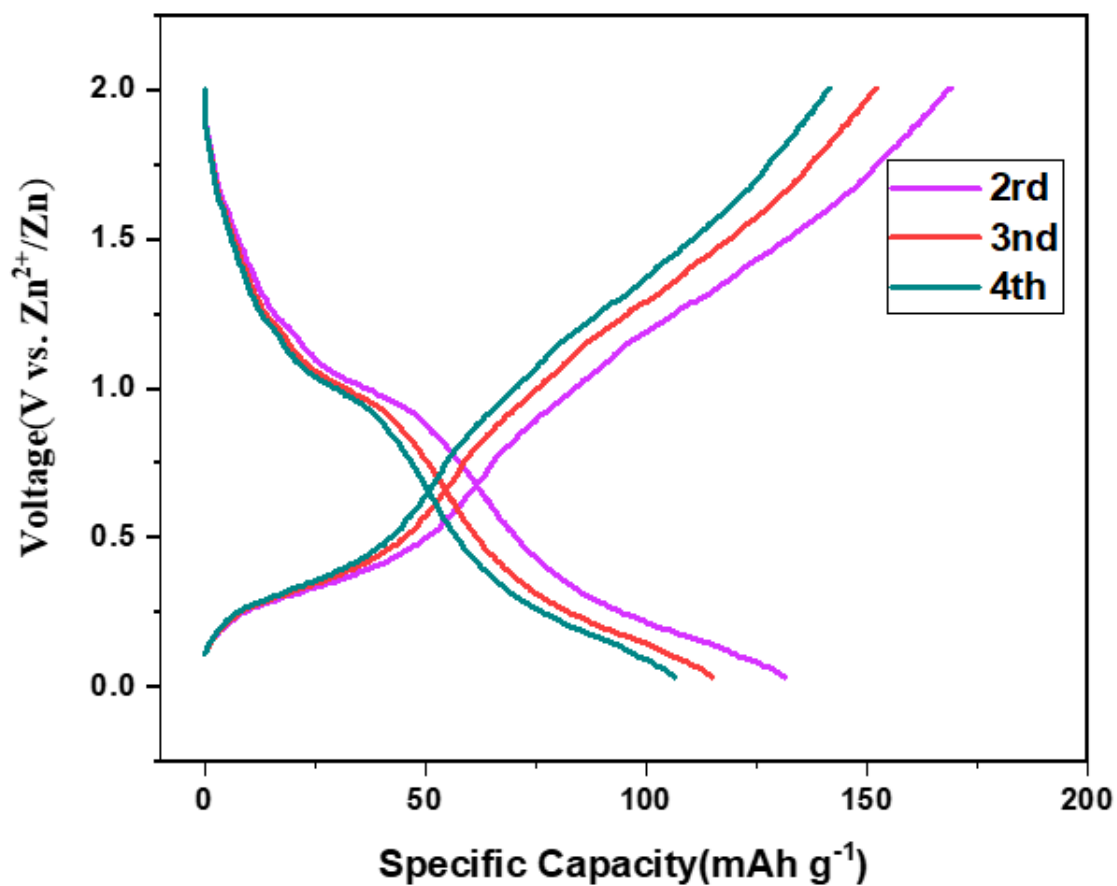

**Figure S6.** charge/discharge curves at 0.1 A g<sup>-1</sup> over the voltage range of 0-2 V of the SnS<sub>2</sub> cathode.

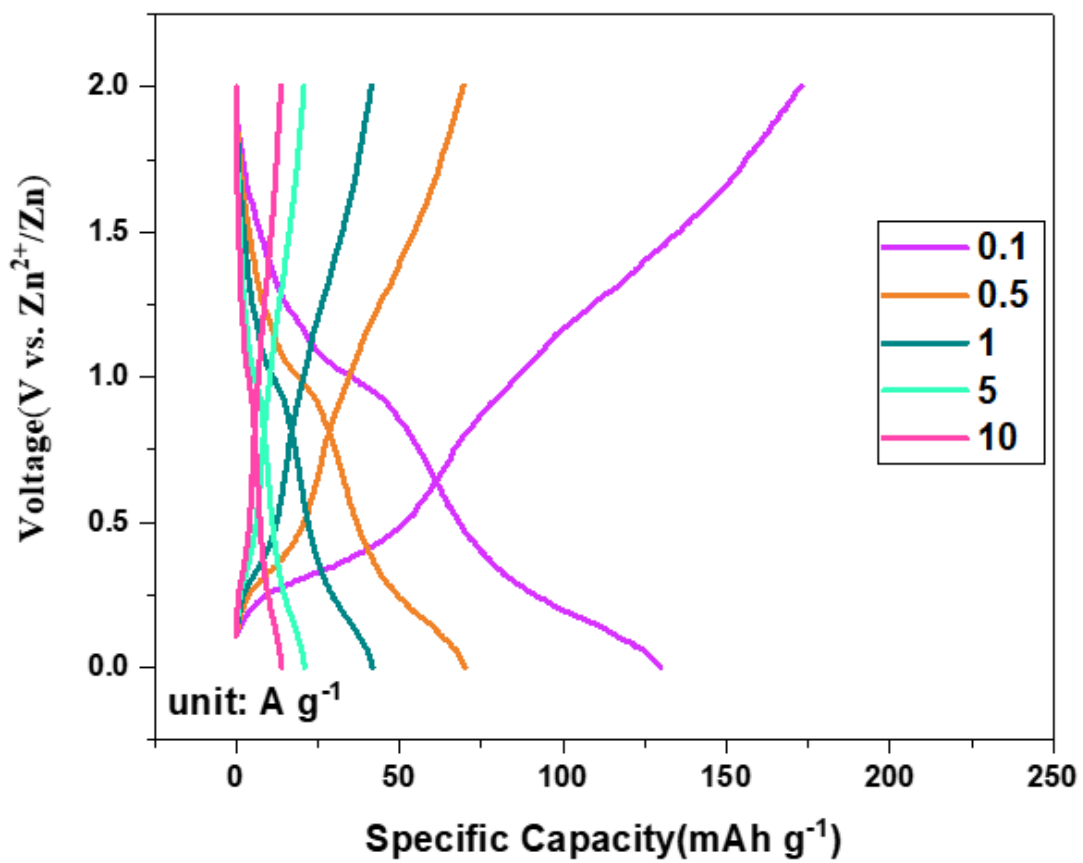

**Figure S7.** Typical galvanostatic charge and discharge profiles of SnS<sub>2</sub> cathode for different current densities.

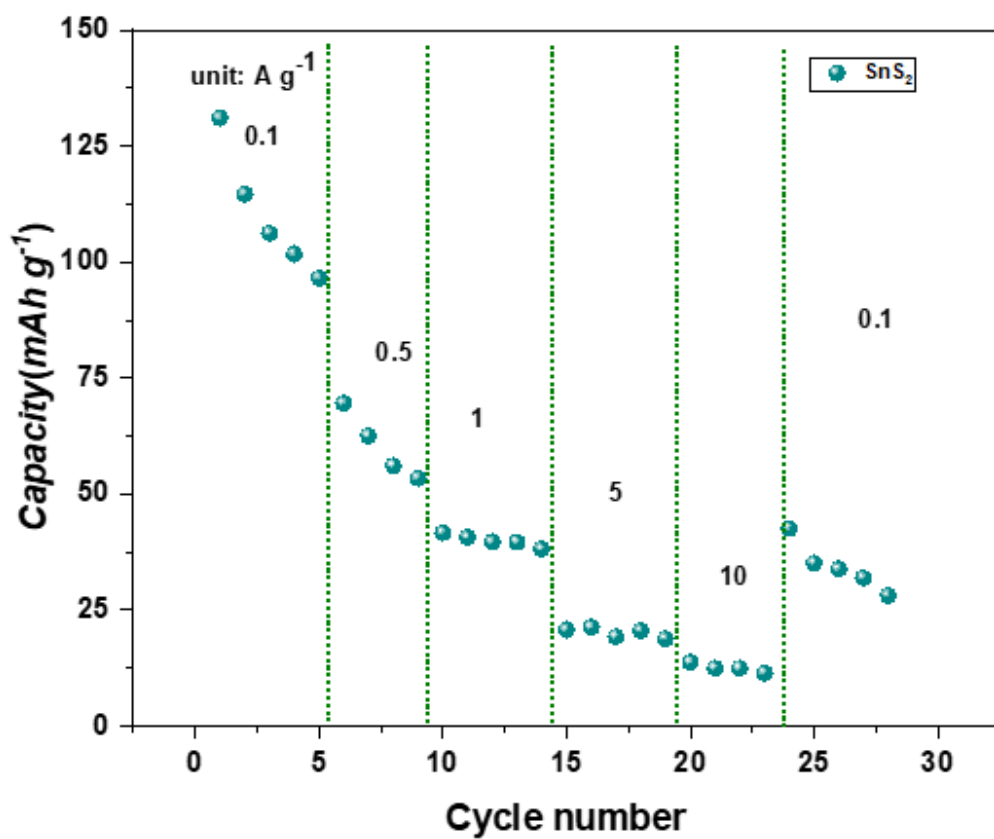

**Figure S8.** Rate capability at 0.1-10 A g<sup>-1</sup> of SnS<sub>2</sub> cathode

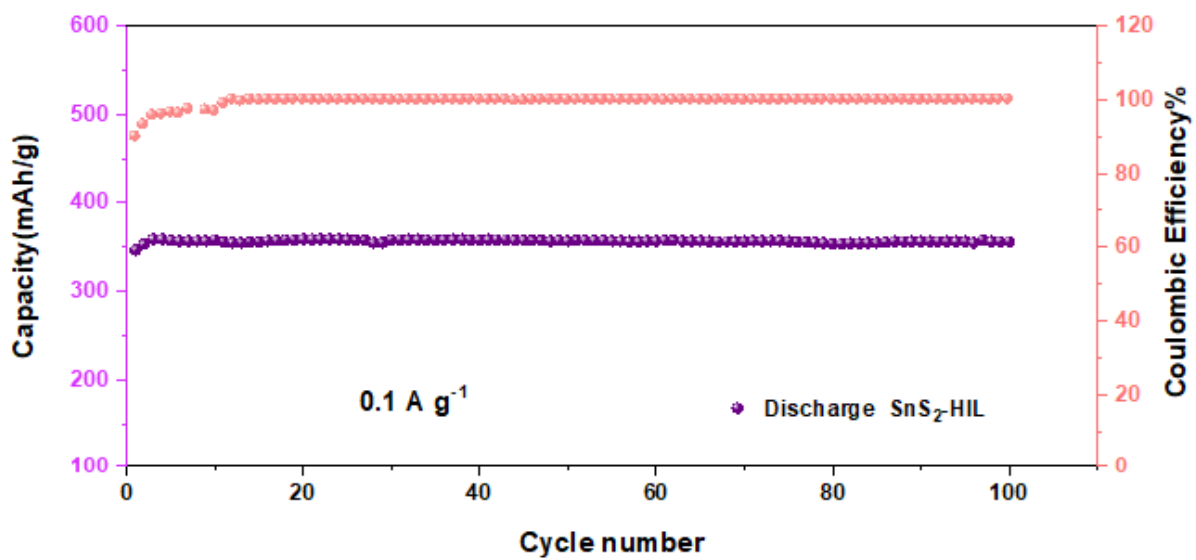

Figure S9 cycling performance at 0.1 A g<sup>-1</sup> of the SnS<sub>2</sub>-HIL cathode.

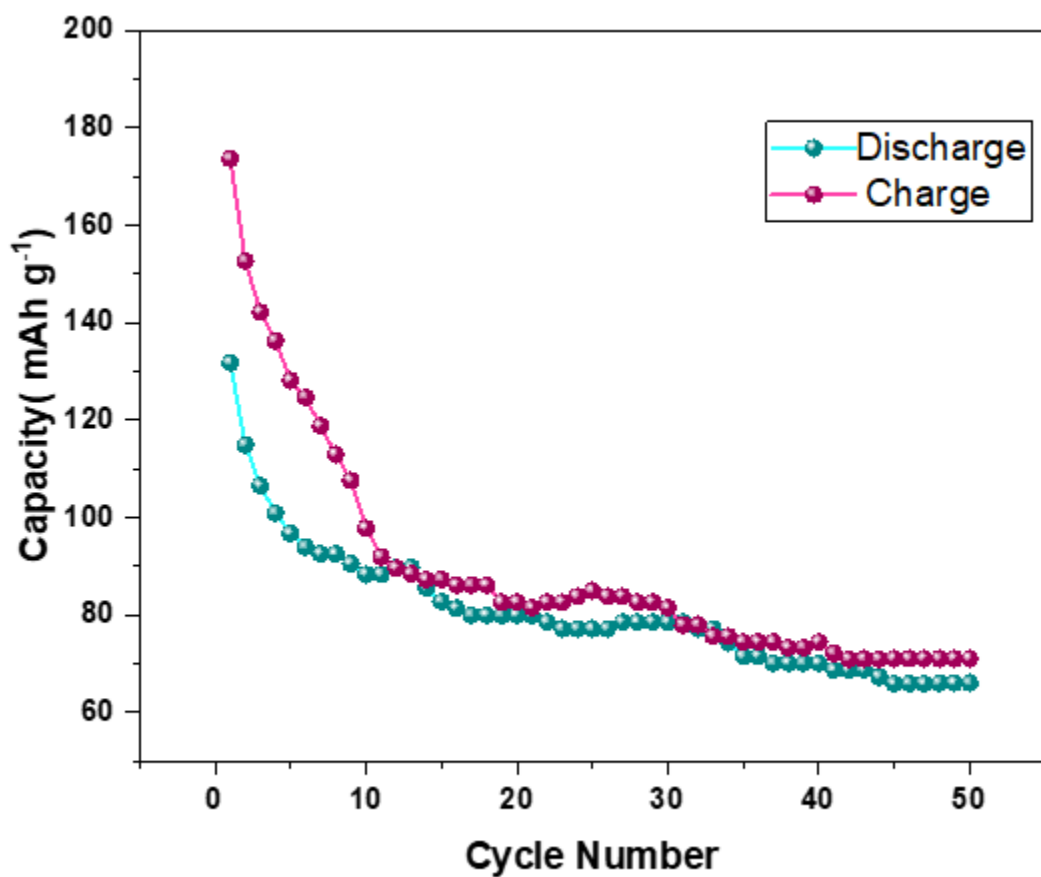

**Figure S10** cycling performance at 0.1 A g<sup>-1</sup> of the pristine SnS<sub>2</sub> cathode.

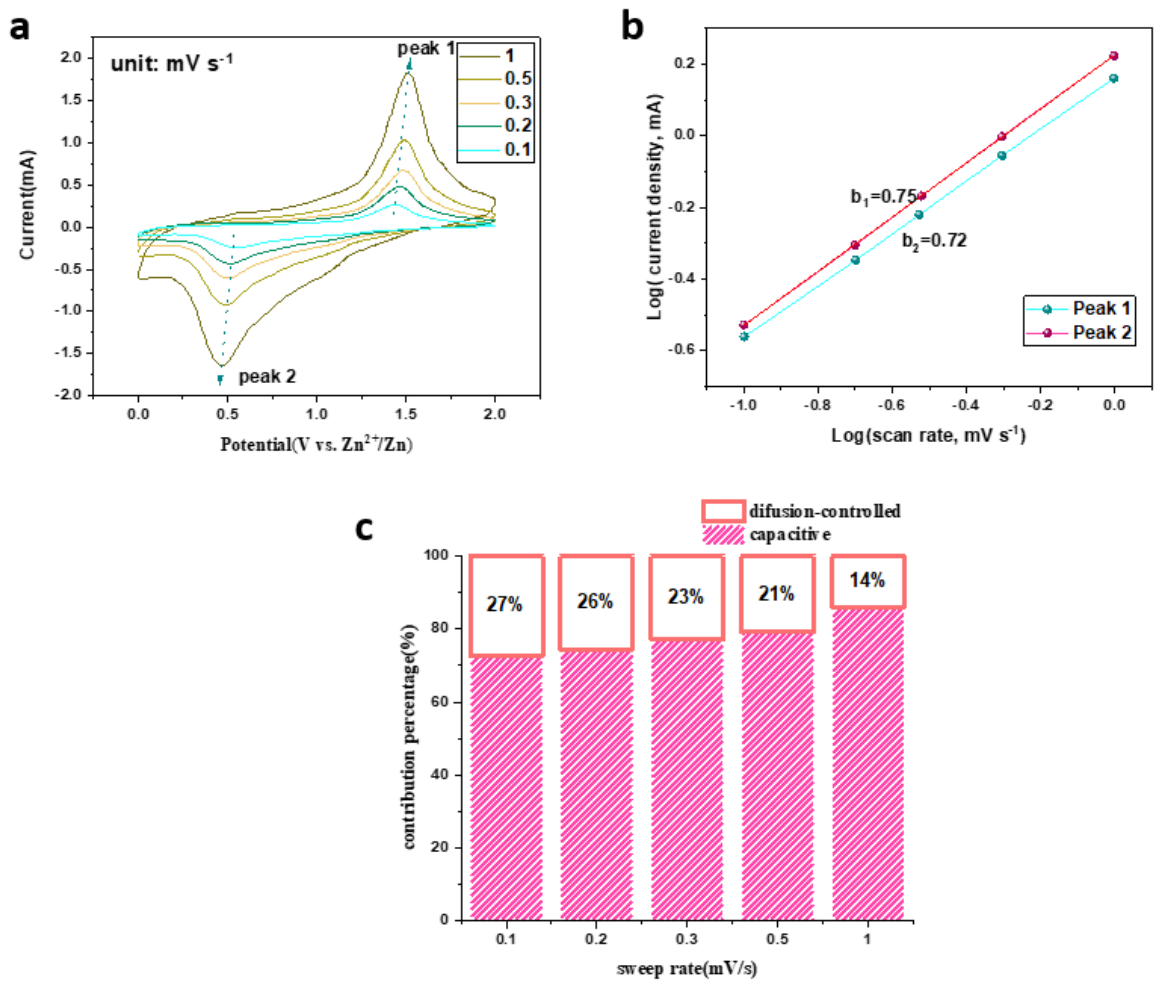

**Figure S11.** a) CV curves of SnS<sub>2</sub> cathode at various scan rates. b) Plots of log i versus log v at specific peak currents. c) The percentage of capacitive contributions for SnS<sub>2</sub> cathode at various sweep rates.

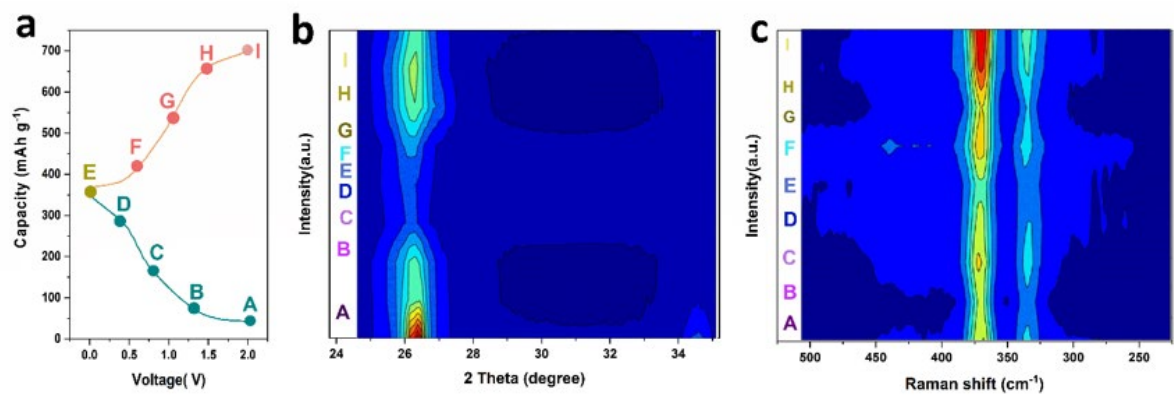

**Figure S12** a) initial discharge/charge curve at  $0.1 \text{ A g}^{-1}$ , the marked states are chosen for ex-situ tests; b) ex-situ XRD patterns; c) ex-situ Raman spectra



**Table S1.** Summary of the electrochemical properties of transition-metal sulfides and selenides cathodes

| Cathode materials                                           | Electrolyte                                           | Voltage     | Capacity [mAh g <sup>-1</sup> ]  | Cycle stability                                      | Ref          |
|-------------------------------------------------------------|-------------------------------------------------------|-------------|----------------------------------|------------------------------------------------------|--------------|
| SnS <sub>2</sub> -HIL                                       | 1m ZnSO <sub>4</sub>                                  | 0-2 V       | 359 mAh g <sup>-1</sup>          | 83.7 after 1000 cycles at 5 A g <sup>-1</sup>        | In this work |
| MoS <sub>2</sub> /PANI                                      | 3 m Zn(CF <sub>3</sub> SO <sub>3</sub> ) <sub>2</sub> | 0.2–1.3 V   | 106.5 at 1.0 A g <sup>-1</sup>   | 86% after 1000 cycles at 1.0 A g <sup>-1</sup>       | 2            |
| MoS <sub>2</sub> @CF                                        | 3 m Zn(CF <sub>3</sub> SO <sub>3</sub> ) <sub>2</sub> | 0.2–1.3 V   | 182 at 0.1 A g <sup>-1</sup>     | 94% over 1500 cycles at 2 A g <sup>-1</sup>          | 3            |
| MoS <sub>2</sub> -nH <sub>2</sub> O                         | 3 m Zn(CF <sub>3</sub> SO <sub>3</sub> ) <sub>2</sub> | 0.2–1.25 V  | 165 at 0.1 A g <sup>-1</sup>     | 88% over 800 cycles at 1 A g <sup>-1</sup>           | 4            |
| 1T MoS <sub>2</sub>                                         | 3 m Zn(CF <sub>3</sub> SO <sub>3</sub> ) <sub>2</sub> | 0.25–1.25 V | 165 at 0.1 A g <sup>-1</sup>     | 98.1% over 400 cycles at 1 A g <sup>-1</sup>         | 5            |
| 200-MoS <sub>2</sub>                                        | 3 m Zn(CF <sub>3</sub> SO <sub>3</sub> ) <sub>2</sub> | 0.25–1.3 V  | 148 at 0.5 A g <sup>-1</sup>     | 100% after 500 cycles at 2 A g <sup>-1</sup>         | 6            |
| Vertical 1T-MoS <sub>2</sub>                                | 3 m Zn(CF <sub>3</sub> SO <sub>3</sub> ) <sub>2</sub> | 0.25–1.25 V | 198 at 0.1 A g <sup>-1</sup>     | 87.8% after 2000 cycles at 1 A g <sup>-1</sup>       | 7            |
| 1T VS <sub>2</sub>                                          | 1 m ZnSO <sub>4</sub>                                 | 0.4–1.0 V   | 190 at 0.01 A g <sup>-1</sup>    | 98% after 200 cycles at 0.5 A g <sup>-1</sup>        | 8            |
| VS <sub>2</sub> @SS                                         | 1 m ZnSO <sub>4</sub>                                 | 0.4–1.0 V   | 190 at 0.05 A g <sup>-1</sup>    | 80% after 2000 cycles at 2 A g <sup>-1</sup>         | 9            |
| 1T WS <sub>2</sub>                                          | 1 m ZnSO <sub>4</sub>                                 | 0.1–1.5 V   | 233.26 at 0.05 A g <sup>-1</sup> | /                                                    | 10           |
| TiSe <sub>2</sub>                                           | 2 m ZnSO <sub>4</sub>                                 | 0.05–0.6 V  | 128 at 0.2 A g <sup>-1</sup>     | 70% after 300 cycles at 1.0 A g <sup>-1</sup>        | 11           |
| VSe <sub>2-x</sub> -SS                                      | 3 m Zn(CF <sub>3</sub> SO <sub>3</sub> ) <sub>2</sub> | 0.4–1.6 V   | 265.2 at 0.2 A g <sup>-1</sup>   | 87.8% over 1800 cycles at 4 A g <sup>-1</sup>        | 12           |
| D-MoS <sub>2</sub> -O                                       | 3 m Zn(CF <sub>3</sub> SO <sub>3</sub> ) <sub>2</sub> | 0.2–1.25 V  | 261 at 0.1 A g <sup>-1</sup>     | 90.5% after 1000 cycles at 1 A g <sup>-1</sup>       | 13           |
| Sn vacancy Co <sub>3</sub> Sn <sub>1.8</sub> S <sub>2</sub> | 1 m Zn(TFSI) <sub>2</sub>                             | 0.01–2.3 V  | 346 at 0.2 A g <sup>-1</sup>     | 83.3% over 2400 cycles at 1 A g <sup>-1</sup>        | 14           |
| N-doped 1T MoS <sub>2</sub>                                 | 3 m Zn(CF <sub>3</sub> SO <sub>3</sub> ) <sub>2</sub> | 0.2–1.3 V   | 149.6 at 0.1 A g <sup>-1</sup>   | 89.1% after 1000 cycles at 3 A g <sup>-1</sup>       | 15           |
| VS <sub>2</sub> @N-C                                        | 3 m Zn(CF <sub>3</sub> SO <sub>3</sub> ) <sub>2</sub> | 0.2–1.8 V   | 203 at 0.05 A g <sup>-1</sup>    | 97% after 600 cycles at 1 A g <sup>-1</sup>          | 16           |
| Co-doped Ni <sub>3</sub> Se <sub>2</sub>                    | 1 m KOH and 0.25 m ZnO                                | 1.4–1.9 V   | 179.34 at 1 A g <sup>-1</sup>    | 85.9% after 1000 cycles at 1 A g <sup>-1</sup>       | 17           |
| MoS <sub>2</sub> /Graphene                                  | 3 m Zn(CF <sub>3</sub> SO <sub>3</sub> ) <sub>2</sub> | 0.2–1.5 V   | 283.9 at 0.1 A g <sup>-1</sup>   | 88.6% after 1800 cycles at 1 A g <sup>-1</sup>       | 18           |
| MoS <sub>2</sub> @CNTs                                      | 3 m Zn(CF <sub>3</sub> SO <sub>3</sub> ) <sub>2</sub> | 0.3–1.2 V   | 161.5 at 0.1 A g <sup>-1</sup>   | 80.1% after 500 cycles at 1 A g <sup>-1</sup>        | 19           |
| rGO-VS <sub>2</sub>                                         | 3 m Zn(CF <sub>3</sub> SO <sub>3</sub> ) <sub>2</sub> | 0.4–1.7 V   | 238 at 0.1 A g <sup>-1</sup>     | 93% after 1000 cycles at 5.0 A g <sup>-1</sup>       | 20           |
| rGO-VSe <sub>2</sub>                                        | 2 m ZnSO <sub>4</sub>                                 | 0.2–1.4 V   | 221.5 at 0.5 A g <sup>-1</sup>   | 91.6% after 150 cycles at 0.5 A g <sup>-1</sup>      | 21           |
| VS <sub>4</sub> @rGO                                        | 1 m Zn(CF <sub>3</sub> SO <sub>3</sub> ) <sub>2</sub> | 0–1.8 V     | 450 at 0.5 A g <sup>-1</sup>     | 82% after 3500 cycles at 10 A g <sup>-1</sup>        | 22           |
| MoS <sub>3</sub> /MWCNTs                                    | 2 m ZnSO <sub>4</sub>                                 | 0.01–2 V    | 368 at 0.5 A g <sup>-1</sup>     | 85.6% after 100 cycles at 0.5 A g <sup>-1</sup>      | 23           |
| MnS/RGO                                                     | 2 m ZnSO <sub>4</sub> and 0.1 m MnSO <sub>4</sub>     | 0.8–1.9 V   | 289 at 0.1 A g <sup>-1</sup>     | 70.8% after 1000 cycles at 1 A g <sup>-1</sup>       | 24           |
| VS <sub>2</sub> @VOOH                                       | 3 m Zn(CF <sub>3</sub> SO <sub>3</sub> ) <sub>2</sub> | 0.4–1.0 V   | 165 at 0.1 A g <sup>-1</sup>     | 86% after 200 cycles at 1.0 A g <sup>-1</sup> [123]  | 25           |
| VS <sub>2</sub> /VO <sub>x</sub>                            | 25 m ZnCl <sub>2</sub>                                | 0.1–1.8 V   | 260 at 0.1 A g <sup>-1</sup>     | 75% after 3000 cycles at 1.0 A g <sup>-1</sup> [142] | 26           |

## References

1. Liu, Y. *et al.* Approaching the Downsizing Limit of Maricite NaFePO<sub>4</sub> toward High-Performance Cathode for Sodium-Ion Batteries. *Adv. Funct. Mater.* **28**, (2018).
2. Huang, M. *et al.* Tuning the kinetics of zinc ion in MoS<sub>2</sub> by polyaniline intercalation. *Electrochim. Acta* **388**, (2021).
3. Liu, H. *et al.* Boosting zinc-ion intercalation in hydrated MoS<sub>2</sub> nanosheets toward substantially improved performance. *Energy Storage Mater.* **35**, 731–738 (2021).
4. Zhang, Z. *et al.* Crystal water assisting MoS<sub>2</sub> nanoflowers for reversible zinc storage. *J. Alloys Compd.* (2021) doi:10.1016/j.jallcom.2021.159599.
5. Liu, J. *et al.* Boosting aqueous zinc-ion storage in MoS<sub>2</sub> via controllable phase. *Chem. Eng. J.* **389**, (2020).
6. Cai, C. *et al.* A nano interlayer spacing and rich defect 1T-MoS<sub>2</sub> as cathode for superior performance aqueous zinc-ion batteries. *Nanoscale Adv.* **3**, 3780–3787 (2021).
7. Liu, J. *et al.* Vertically aligned 1 T phase MoS<sub>2</sub> nanosheet array for high-performance rechargeable aqueous Zn-ion batteries. *Chem. Eng. J.* **428**, (2022).
8. He, P. *et al.* Layered VS<sub>2</sub> nanosheet-based aqueous Zn ion battery cathode. *Adv. Energy Mater.* **7**, 1601920 (2017).
9. Jiao, T. *et al.* Binder-free hierarchical VS<sub>2</sub> electrodes for high-performance aqueous Zn ion batteries towards commercial level mass loading. *J. Mater. Chem. A* **7**, 16330–16338 (2019).
10. Tang, B. *et al.* Investigation of zinc storage capacity of WS<sub>2</sub> nanosheets for rechargeable aqueous Zn-ion batteries. *J. Alloys Compd.* **894**, (2022).
11. Wen, L. *et al.* A novel TiSe<sub>2</sub> (de)intercalation type anode for aqueous zinc-based energy storage. *Nano Energy* vol. 93 (2022).
12. Bai, Y. *et al.* Selenium Defect Boosted Electrochemical Performance of Binder-Free VSe<sub>2</sub> Nanosheets for Aqueous Zinc-Ion Batteries. *ACS Appl. Mater. Interfaces* **13**, 23230–23238 (2021).
13. Li, S. *et al.* Molecular Engineering on MoS<sub>2</sub> Enables Large Interlayers and Unlocked Basal Planes for High-Performance Aqueous Zn-Ion Storage. *Angew. Chemie - Int. Ed.* **60**, 20286–20293 (2021).
14. Zhao, Y. *et al.* Vacancy Modulating Co<sub>3</sub>Sn<sub>2</sub>S<sub>2</sub> Topological Semimetal for Aqueous Zinc-Ion Batteries. *Angew. Chemie - Int. Ed.* **61**, (2022).
15. Sheng, Z. *et al.* Nitrogen-Doped Metallic MoS<sub>2</sub> Derived from a Metal-Organic Framework for Aqueous Rechargeable Zinc-Ion Batteries. *ACS Appl. Mater. Interfaces* **13**, 34495–34506 (2021).
16. Liu, J., Peng, W., Li, Y., Zhang, F. & Fan, X. A VS<sub>2</sub>@N-doped carbon hybrid with strong interfacial

- interaction for high-performance rechargeable aqueous Zn-ion batteries. *J. Mater. Chem. C* **9**, 6308–6315 (2021).
17. Amaranatha Reddy, D. *et al.* Facile synthesis of cauliflower-like cobalt-doped Ni<sub>3</sub>Se<sub>2</sub> nanostructures as high-performance cathode materials for aqueous zinc-ion batteries. *Int. J. Hydrogen Energy* **45**, 7741–7750 (2020).
  18. Li, S. *et al.* Sandwich-Like Heterostructures of MoS<sub>2</sub>/Graphene with Enlarged Interlayer Spacing and Enhanced Hydrophilicity as High-Performance Cathodes for Aqueous Zinc-Ion Batteries. *Adv. Mater.* **33**, (2021).
  19. Huang, M. *et al.* Hierarchical MoS<sub>2</sub>@CNTs Hybrid as a Long-Life and High-Rate Cathode for Aqueous Rechargeable Zn-Ion Batteries. *ChemElectroChem* **7**, 4218–4223 (2020).
  20. Chen, T. *et al.* VS<sub>2</sub> nanosheets vertically grown on graphene as high-performance cathodes for aqueous zinc-ion batteries. *J. Power Sources* **477**, (2020).
  21. Narayanasamy, M. *et al.* Nanohybrid engineering of the vertically confined marigold structure of rGO-VSe<sub>2</sub> as an advanced cathode material for aqueous zinc-ion battery. *J. Alloys Compd.* **882**, (2021).
  22. Chen, K. *et al.* Robust VS<sub>4</sub>@rGO nanocomposite as a high-capacity and long-life cathode material for aqueous zinc-ion batteries. *Nanoscale* **13**, 12370–12378 (2021).
  23. Liu, Y. *et al.* Performance and application of carbon composite MoS<sub>3</sub> as cathode materials for aqueous zinc-ion batteries. *J. Alloys Compd.* **893**, (2022).
  24. Ma, S. C. *et al.* In situ preparation of manganese sulfide on reduced graphene oxide sheets as cathode for rechargeable aqueous zinc-ion battery. *J. Solid State Chem.* **299**, (2021).
  25. Pu, X. *et al.* Rose-like vanadium disulfide coated by hydrophilic hydroxyvanadium oxide with improved electrochemical performance as cathode material for aqueous zinc-ion batteries. *J. Power Sources* **437**, (2019).
  26. Yu, D. *et al.* Boosting Zn<sup>2+</sup> and NH<sub>4</sub><sup>+</sup> Storage in Aqueous Media via In-Situ Electrochemical Induced VS<sub>2</sub>/VO<sub>x</sub> Heterostructures. *Adv. Funct. Mater.* **31**, (2021).
